# Supplementary material
Source: Elsevier journal article supplement (https://www.sciencedirect.com/science/article/pii/S0213911121003411)
Supplement: mmc1 [file S0213911121003411:mmc1.doc]

**Appendix**

**Table I**

Yearly contribution to the life expectancy gap at 25 years by educational level presented by age group in percentages

in Barcelona (2004-2018)a

| **Men** | **25-29** | **30-34** | **35-39** | **40-44** | **45-49** | **50-54** | **55-59** | **60-64** | **65-69** | **70-74** | **75-79** | **80-84** | **85-89** | **≥90** | **%** |
| --- | --- | --- | --- | --- | --- | --- | --- | --- | --- | --- | --- | --- | --- | --- | --- |
| 2004 | 3.9 | 6.5 | 9.6 | 13.5 | 10.3 | 3.9 | 11 | 8.3 | 9.4 | 6 | 12.8 | 4.6 | -0.3 | 0.5 | 100 |
| 2005 | 1.4 | 6.5 | 7.3 | 9.7 | 11.8 | 11.1 | 10.5 | 3.5 | 7.6 | 9.6 | 8.5 | 7.2 | 3.4 | 1.9 | 100 |
| 2006 | 5.4 | 5.4 | 8.5 | 11.8 | 8.1 | 12.6 | 11.8 | 5.9 | 4 | 4.5 | 6.5 | 5.6 | 7.4 | 2.5 | 100 |
| 2007 | 2.9 | 0.8 | 8 | 12.5 | 12.9 | 11 | 14.3 | 8.5 | 8.3 | 5.6 | 3.3 | 5.4 | 2.7 | 3.8 | 100 |
| 2008 | 1.7 | 3.2 | 5.7 | 7.4 | 13.6 | 6.6 | 7.6 | 9 | 10 | 6.4 | 12.5 | 7.2 | 5.1 | 4 | 100 |
| 2010 | 1.3 | 2.2 | 4.8 | 9.6 | 17 | 8.6 | 6.6 | 13.6 | 1.9 | 15.1 | 9.1 | 6.5 | 2.3 | 1.4 | 100 |
| 2011 | 1.2 | 3.9 | 2.5 | 7.1 | 9.8 | 11.2 | 12.8 | 10.4 | 6.6 | 10.9 | 7.4 | 1.4 | 4.6 | 10.2 | 100 |
| 2012 | 2.2 | 3.1 | 4.6 | 4.2 | 14.8 | 12.6 | 8.5 | 15 | 7.6 | 12.4 | 6.4 | 2.5 | 3.6 | 2.5 | 100 |
| 2013 | 1.3 | 0.1 | 2.6 | 7.1 | 11 | 13.5 | 11.5 | 17.1 | 10.9 | 5.3 | 8.4 | 2.3 | 3.4 | 5.5 | 100 |
| 2014 | 4.2 | 0.7 | 5.8 | 4.6 | 10.3 | 11 | 13.5 | 14.2 | 3.3 | 9 | 7.2 | 4.2 | 6.6 | 5.4 | 100 |
| 2015 | 2.8 | 1.6 | 4.2 | 6.5 | 7.7 | 11.1 | 8.3 | 11.1 | 13.6 | 7 | 12.3 | 5.2 | 6.1 | 2.5 | 100 |
| 2016 | 1.7 | 3.8 | 4.7 | 4.1 | 7.3 | 14 | 7.4 | 15.4 | 12.9 | 14.5 | 6.9 | 3.1 | 4.2 | 0 | 100 |
| 2017 | 0 | 3.3 | 2.4 | 4.1 | 6.5 | 10 | 12 | 13.7 | 14.4 | 9.3 | 10.5 | 4.6 | 4.8 | 4.4 | 100 |
| 2018 | 1.1 | 2.3 | 3.9 | 4.3 | 6.6 | 8.9 | 14.3 | 11.2 | 12.6 | 11.8 | 5.2 | 6.4 | 7.2 | 4.2 | 100 |
| Mean | 2.2 | 3.1 | 5.3 | 7.6 | 10.6 | 10.4 | 10.7 | 11.2 | 8.8 | 9.1 | 8.3 | 4.7 | 4.4 | 3.5 |  |
| Trendb (p) | No  0.102 | Yes –  0.048 | Yes –  0.001 | Yes –  0.000 | Yes –  0.060 | No  0.218 | No  0.833 | Yes +  0.006 | Yes +  0.049 | No  0.138 | No  0.661 | No  0.339 | Yes +  0.059 | No  0.494 |  |

a Data for 2009 are missing.

b Significance for linear trend at p <0.1: *No* stands for no trends; *Yes –* for downward trend;*Yes +* for upward trend.

| **Women** | **25-29** | **30-34** | **35-39** | **40-44** | **45-49** | **50-54** | **55-59** | **60-64** | **65-69** | **70-74** | **75-79** | **80-84** | **85-89** | **≥90** | **%** |
| --- | --- | --- | --- | --- | --- | --- | --- | --- | --- | --- | --- | --- | --- | --- | --- |
| 2004 | 1.6 | 6.0 | 8.7 | 7.1 | –1.6 | 0.9 | 4.6 | –2.2 | 8.4 | 11.8 | 8.7 | 8.3 | 16.6 | 21.1 | 100 |
| 2005 | 2.6 | 5.4 | 6.7 | 4.3 | 8.9 | 3.9 | 3.6 | –6.6 | 7.7 | 9.9 | 8.1 | 15.3 | 9.9 | 20.3 | 100 |
| 2006 | 8.2 | 2.7 | 14.3 | 13.2 | 12.3 | 4.5 | –4.2 | 0.8 | 5.2 | 0.9 | 9.5 | 10.4 | 10.3 | 11.9 | 100 |
| 2007 | 3.1 | 5.9 | 8.3 | 12.1 | 3.4 | 0.1 | 12.2 | 1.0 | –1.7 | –1.2 | 3.4 | 9.2 | 13.6 | 30.6 | 100 |
| 2008 | –0.2 | 1.4 | 15.0 | 7.3 | 6.9 | 4.9 | –2.6 | –1.7 | 10.6 | 8.6 | 1.3 | 20.0 | 15.3 | 13.2 | 100 |
| 2010 | 0.1 | 4.4 | 6.0 | 8.3 | 6.7 | 6.2 | 3.4 | 6.3 | 4.1 | 7.0 | 9.1 | 16.1 | –0.2 | 22.5 | 100 |
| 2011 | 3.1 | 6.1 | 8.0 | 11.4 | 2.2 | 12.2 | 2.7 | –1.4 | 5.1 | 6.3 | 1.9 | 7.6 | 10.3 | 24.5 | 100 |
| 2012 | 2.2 | 3.6 | 3.6 | 8.6 | 7.5 | 6.0 | 2.4 | 6.2 | –0.2 | 5.9 | 8.1 | 15.1 | 17.7 | 13.3 | 100 |
| 2013 | 7.8 | –0.4 | 0.1 | 9.7 | 7.4 | 10.5 | 9.5 | 1.0 | –2.2 | 6.3 | –1.0 | 16.6 | 25.8 | 8.9 | 100 |
| 2014 | 7.2 | 3.5 | 4.5 | 5.6 | 10.1 | 4.2 | 4.1 | 0.1 | 8.1 | 6.8 | 9.6 | 8.6 | 15.8 | 11.8 | 100 |
| 2015 | 1.0 | 4.2 | 4.0 | 7.3 | 2.5 | 5.5 | –0.6 | 1.8 | 10.8 | 1.6 | 2.3 | 15.5 | 16.2 | 27.9 | 100 |
| 2016 | 0.8 | 3.0 | 2.6 | 3.4 | 7.9 | 7.9 | 4.7 | 2.6 | 4.9 | 0.6 | 16.0 | 11.0 | 5.2 | 29.4 | 100 |
| 2017 | 0.4 | 1.1 | 4.2 | 5.1 | 2.8 | 12.8 | 6.6 | 1.7 | 0.9 | 4.5 | 6.7 | 17.0 | 6.1 | 30.1 | 100 |
| 2018 | 0.2 | 1.6 | 3.5 | 10.1 | 2.0 | 2.4 | 9.8 | 6.0 | –0.4 | 4.3 | 6.9 | 10.9 | 11.9 | 30.8 | 100 |
| Mean | 2.7 | 3.5 | 6.4 | 8.1 | 5.6 | 5.9 | 4.0 | 1.1 | 4.4 | 5.2 | 6.5 | 13.0 | 12.4 | 21.2 |  |
| Trendb (p) | No  0.488 | Yes –  0.044 | Yes –  0.010 | No  0.385 | No  0.726 | No  0.106 | No  0.324 | Yes +  0.034 | No  0.313 | No  0.188 | No  0.837 | No  0.669 | No  0.834 | No  0.206 |  |

a Data for 2009 are missing.

b Significance for linear trend at p <0.1: *No* stands for no trends; *Yes –* for downward trend;*Yes +* for upward trend.

**Table II**

Yearly contribution to the life expectancy gap at 25 years by educational level presented by broad causes of death in percentages

in Barcelona (2004-2018)a

| **Men** | **Circulatory**  **system** | **Neoplasms** | **External**  **causes** | **Respiratory**  **system** | **Infectious &**  **parasitic** | **Digestive**  **system** | **Endocrine** | **Mental &**  **behav. disor.** | **Nervous**  **system** | **Genitouri-**  **nary system** | **Abnormal** | **Others** | **%** |
| --- | --- | --- | --- | --- | --- | --- | --- | --- | --- | --- | --- | --- | --- |
| 2004 | 21.3 | 19.5 | 14.8 | 14.2 | 9.1 | 8.9 | 4.4 | 3.9 | 1.6 | 1.1 | 1,3 | -0,1 | 100 |
| 2005 | 18.2 | 27.4 | 14.4 | 10.5 | 10.6 | 6.9 | 3.3 | 2.1 | 2.2 | 2.7 | 1,1 | 0,6 | 100 |
| 2006 | 15.5 | 21.5 | 18.5 | 13.2 | 9.3 | 11.2 | 1.2 | 3.5 | 2.8 | 0.4 | 2,2 | 0,7 | 100 |
| 2007 | 20.6 | 33.3 | 11.7 | 10.7 | 8.9 | 5.3 | 3.6 | 3.7 | 0.9 | -1.4 | 1,2 | 1,5 | 100 |
| 2008 | 22.3 | 22.3 | 7.7 | 20.5 | 4.8 | 8.5 | 1.1 | 2.9 | 4.1 | 2.9 | 2,6 | 0,3 | 100 |
| 2010 | 14.3 | 32.1 | 8.0 | 14.0 | 7.0 | 8.0 | 3.3 | 2.7 | 4.7 | 0.5 | 1,7 | 3,7 | 100 |
| 2011 | 15.6 | 36.7 | 4.0 | 14.7 | 5.4 | 6.7 | 4.8 | 4.4 | 1.3 | 2.8 | 0,6 | 3 | 100 |
| 2012 | 11.2 | 30.3 | 11.4 | 18.4 | 5.6 | 13.0 | 1.1 | 3.3 | 3.5 | -0.3 | 0,1 | 2,4 | 100 |
| 2013 | 16.8 | 35.3 | 9.9 | 13.9 | 3.1 | 8.3 | 4.2 | 2.1 | 1.2 | 2.3 | 0,6 | 2,3 | 100 |
| 2014 | 23.4 | 20.6 | 11.0 | 17.2 | 6.3 | 9.0 | 2.2 | 5.3 | 1.3 | 2.6 | 0,7 | 0,4 | 100 |
| 2015 | 21.5 | 23.7 | 7.7 | 18.3 | 1.6 | 7.3 | 4.4 | 4.0 | 6.0 | 2.3 | 1,1 | 2,1 | 100 |
| 2016 | 20.8 | 35.6 | 7.9 | 11.7 | 3.5 | 7.9 | 2.6 | 3.0 | 5.2 | 1.4 | 0,5 | -0,1 | 100 |
| 2017 | 20.4 | 30.1 | 2.1 | 18.5 | 1.5 | 10.7 | 5.5 | 5.0 | 3.9 | 3.5 | 0,4 | -1,6 | 100 |
| 2018 | 13.2 | 34.4 | 7.7 | 19.0 | 0.1 | 9.9 | 4.3 | 4.2 | 3.9 | 2.0 | 0,6 | 0,7 | 100 |
| Mean | 18.2 | 28.8 | 9.8 | 15.3 | 5.5 | 8.7 | 3.3 | 3.6 | 3.0 | 1.6 | 1.1 | 1,1 |  |
| Trendb (p) | No  0.879 | No  0.141 | Yes –  0.007 | Yes +  0.071 | Yes –  0.000 | No  0.442 | No  0.315 | No  0.156 | Yes –  0.096 | No  0.197 | Yes –  0.025 | No  0.872 |  |

a Data for 2009 are missing.

b Significance for linear trend at p <0.1: *No* stands for no trends; *Yes –* for downward trend;*Yes +* for upward trend.

| **Women** | **Circulatory**  **system** | **Mental &**  **behav. disor.** | **Neoplasms** | **Digestive**  **system** | **Genitouri-**  **nary sys.** | **Infectious &**  **parasitic** | **Endocrine** | **External**  **causes** | **Respiratory**  **system** | **Abnormal** | **Nervous**  **system** | **Others** | **%** |
| --- | --- | --- | --- | --- | --- | --- | --- | --- | --- | --- | --- | --- | --- |
| 2004 | 22.8 | 16.6 | 11.5 | 11.4 | 8.5 | 8.3 | 5.9 | 3.5 | 3.4 | 3.0 | 2.8 | 2.3 | 100 |
| 2005 | 30.4 | 9.8 | 4.9 | 11.8 | 2.3 | 8.2 | 6.3 | 9.4 | 5.6 | 3.1 | 6.1 | 2.1 | 100 |
| 2006 | 29.8 | 9.3 | 14.6 | 8.0 | 3.3 | 9.7 | 9.7 | 10.2 | -0.6 | -0.2 | 3.4 | 2.8 | 100 |
| 2007 | 36.7 | 5.7 | 0.7 | 11.7 | 6.3 | 10.0 | 8.7 | 15.4 | 2.0 | -0.7 | 1.5 | 2.0 | 100 |
| 2008 | 24.9 | 11.7 | -5.1 | 0.6 | 3.7 | 9.3 | 14.7 | 9.1 | 11.1 | 5.8 | 10.0 | 4.2 | 100 |
| 2010 | 31.6 | 5.3 | 12.7 | 10.4 | 2.3 | 3.6 | 9.1 | 3.5 | 8.8 | -0.8 | 12.8 | 0.7 | 100 |
| 2011 | 12.3 | 4.6 | 17.7 | 11.0 | 8.3 | 10.2 | 8.1 | 9.1 | 8.0 | 0.9 | 5.7 | 4.1 | 100 |
| 2012 | 32.5 | 11.0 | 2.6 | 11.2 | 4.4 | 7.7 | 10.1 | 6.9 | 9.0 | -0.2 | 8.1 | -3.3 | 100 |
| 2013 | 32.0 | 7.6 | -4.2 | 2.7 | 4.4 | 7.1 | 10.1 | 7.6 | 8.9 | 2.2 | 15.8 | 5.8 | 100 |
| 2014 | 20.5 | 6.4 | 6.3 | 8.5 | 6.8 | 5.3 | 8.1 | 7.4 | 14.8 | 2.4 | 10.0 | 3.5 | 100 |
| 2015 | 39.6 | 12.8 | -9.0 | 13.3 | 4.2 | 6.5 | 2.2 | 4.2 | 11.0 | 0.0 | 10.6 | 4.6 | 100 |
| 2016 | 34.2 | 17.9 | 1.2 | 7.9 | -1.4 | 11.1 | 8.1 | 5.3 | 9.4 | 0.9 | 3.1 | 2.3 | 100 |
| 2017 | 23.3 | 12.2 | 13.6 | 5.8 | 6.3 | 3.6 | 6.0 | 8.8 | 8.4 | 0.1 | 9.8 | 2.1 | 100 |
| 2018 | 29.5 | 6.9 | 6.4 | 8.6 | 5.1 | 2.0 | 4.4 | 3.5 | 15.1 | 2.2 | 6.5 | 9.8 | 100 |
| Mean | 28.6 | 9.8 | 5.3 | 8.8 | 4.6 | 7.3 | 8.0 | 7.4 | 8.2 | 1.4 | 7.6 | 3.0 |  |
| Trendb (p) | No  0.766 | No  0.914 | No  0.514 | No  0.514 | No  0.638 | Yes –  0.060 | No  0.234 | No  0.217 | Yes +  0.003 | No  0.526 | No  0.211 | No  0.202 |  |

a Data for 2009 are missing.

b Significance for linear trend at p <0.1: *No* stands for no trends; *Yes –* for downward trend;*Yes +* for upward trend.

**Statistical code to generate life tables and decomposition by cause and age**

The user should supply one file for each socioeconomic group to be compared. The files containing information on the age at the start of the age category (e.g., 0, 1, 5, … 85, 90), the number of individuals in population by age and category, the number of deaths from all causes by age category (a more detailed information can be found elsewere15).

// #1

// bring in data on deaths and population

forvalues i=1/2 {

use `name`i'', clear

qui reshape long c, i(age) j(cause)

rename c cause_

qui sum cause

local ncauses=r(max)

qui sum age

local maxage=r(max)

reshape wide cause_, i(age) j(cause)

forvalues j=1/`ncauses' {

disp `j'

label var cause_`j' "deaths from cause `j'"

gen pc_`j'_ = cause_`j'/death

label var pc_`j'_ "% of deaths from cause `j'"

}

unab pclist : pc_1_ - pc_`ncauses'_

gen group=`i'

order group age death

save in`name`i'', replace

}

use in`name1'

append using in`name2'

* create and save dataset of fractions of death by cause for each age group

drop death pop cause_*

reshape wide pc*, i(age) j(group)

// #2

// set up for life table calculation

* define number of years in age interval, assuming that n=1 for the

* first interval for infant mortality

sort group age

bysort group: gen n=age[_n+1] - age[_n]

replace n=1 if age==0 | age==90

label var n "no. years in age interval"

* average person-years contributed by those dying within interval

gen ax=0.1 if age==0

replace ax=0.5 if age>0 & age<=90

* life table variables

foreach var in m q p l d L T e {

qui gen `var'x=.

}

* labels

label var ax "avg time contributed by deaths"

label var mx "death rate at age x"

label var qx "probability of death at age x"

label var px "probability of survival at age x"

label var lx "number alive at age x"

label var dx "expected deaths at age x"

label var Lx "person-years lived in interval"

label var Tx "time lived beyond age x"

label var ex "life expectancy at age x"

label var group "population group"

label var age "age group"

label var death "total deaths"

label var pop "total population"

* sort by age

sort group age

// #3

// calculate life table values by group

qui levelsof group, local(levels)

foreach l of local levels {

* mortality rate

qui replace mx=death/pop if group==`l'

* probability of death

qui replace qx=n*mx/(1+n*(1-ax)*mx) if group==`l'

qui replace qx = 1 if age==90 & group==`l'

* conditional prob of survival

qui replace px=1-qx if group==`l'

* no. alive at beginning of interval

qui replace lx = 100000 if age==25 & group==`l'

qui replace lx = lx[_n-1] * px[_n-1] if age>25 & group==`l'

* Generate deaths by differencing the number of survivors and

* noting that everyone dies in the end

qui replace dx = lx - lx[_n+1] if group==`l'

qui replace dx = lx if age==90 & group==`l'

* Compute person-years lived in each age group

* n for those who survive the age group and nax for those who die

qui replace Lx = n * (lx[_n+1] + (ax*dx)) if group==`l'

qui replace Lx = lx/mx if age==90 & group==`l'

* Accumulating from the bottom up is a bit tricky because Stata likes to sum from the top down. You could sort the data from oldest to youngest, sum, and then sort again. I will subtract the cumulative sum from the total.*/

qui sum Lx if group==`l'

qui replace Tx = r(sum) - sum(Lx) + Lx if group==`l'

* Compute life expectancy (time lived after each age / survivors to that age)

qui replace ex = Tx/lx if group==`l'

}

* specify a few formats to make the presentation nicer

format %6.3f ax ex

format %8.6f mx qx px

format %9.0fc pop death lx dx Lx Tx

* table of life expectancy at each age by group

table age group, c(mean ex)

// #3

// decompose life expectancy difference by age using formulas from

// Arriaga EE. Measuring and explaining the change in life expectancies.

// Demography 1984;21:83-96.

*drop unnecessary variables and reshape the data to wide format with

*rows for each sex year age and colums for each race group

drop n dx qx

reshape wide pop death ax mx px lx Tx Lx ex, i(age) j(group)

* generate direct effect in each age group

gen de=(lx2/100000) * ((Lx1/lx1) - (Lx2/lx2))

label var de "direct effect"

* generate indirect effect and interaction term */

gen ie=(Tx1[_n+1]/100000) * ((lx2/lx1) - (lx2[_n+1]/lx1[_n+1])) if age!=90

replace ie=0 if age==90

label var ie "indirect effect+interact"

* total effect (direct + indirect + interaction)

gen te=de+ie

label var te "diff in life exp"

* calculate total LE gap by group

egen gap=total(te)

label var gap "total life expectancy gap"

gen pctgap=te/gap*100

label var pctgap "percentage contribution to the gap by age"

* table of contribution of each age group to the total gap

table age, c(sum te sum pctgap) row format(%5.3f)

// #4

// decomposition by cause of death using formulas from Arriaga (1988)

// Changing trends in mortality decline during the last decades. In:

// Differential mortality: methodological issues and biosocial factors, edited

// by Ruzicka et al., 108-29. Oxford, UK: Clarendon Press, 1989 */

* merge age-specific contributions with cause-specific mortality data

merge 1:1 age using causes

drop _merge

local i = 1

while `i' <= 20 {

gen cause`i' = te * (((mx1*(pc_`i'_1) - (mx2*pc_`i'_2)))) / (mx1 - mx2)

local ++i

}

// #5

// make some tables to describe results

*reshape the data from wide to long, with each observation now

*consisting of the age-cause-specific contribution to the gap

drop pc*

reshape long cause, i(age) j(cod)

rename cause cont

label var cont "contribution to LE gap"

label var cod "causes of death"

* net effect of age groups and causes of death, by period

table age, contents(sum cont) row format(%4.3f)

table cod, contents(sum cont) row format(%4.3f)

log close

exit

**
